# Supplementary material
Source: publisher figshare collection journal article supplement (https://frontiersin.figshare.com/ndownloader/files/25519268)
Supplement: Supplementary file 1 [file 25519268]

**SUPPLEMENTARY MATERIAL**

Appendix A

Population (2010), 2050-Projected Population, and Predicted Annual Property Loss (2016$), by Louisiana Parish.

|  | Population | | Projected Annual Property Loss in 2050 (2016$) | | | |
| --- | --- | --- | --- | --- | --- | --- |
| 2010 | 2050 | Extreme Cold | Hail | Lightning | Tornado |
| Acadia | 61,773 | 68,029 | 132,259 | 2,759 | 11,017 | 1,111,960 |
| Allen | 25,764 | 31,025 | 210,771 | 1,917 | 17,661 | 37,724 |
| Ascension | 107,215 | 283,292 | 899,366 | 38,256 | 121,074 | 501,619 |
| Assumption | 23,421 | 23,503 | 123,706 | 5,490 | 22,869 | 67,950 |
| Avoyelles | 42,073 | 41,205 | 155,465 | 18,231 | 39,916 | 51,564 |
| Beauregard | 35,654 | 45,047 | 277,283 | 5,817 | 25,910 | 215,735 |
| Bienville | 14,353 | 11,588 | 305,035 | 1,152 | 15,592 | 184,681 |
| Bossier | 116,979 | 187,953 | 934,065 | 489,704 | 564,376 | 9,876,829 |
| Caddo | 254,969 | 243,724 | 423,332 | 227,133 | 40,810 | 1,169,140 |
| Calcasieu | 192,768 | 235,659 | 215,224 | 4,708 | 41,333 | 440,481 |
| Caldwell | 10,132 | 9,330 | 104,325 | 1,741 | 11,115 | 89,373 |
| Cameron | 6,839 | 5,161 | 70,130 | 711 | 7,292 | 54,756 |
| Catahoula | 10,407 | 8,030 | 78,661 | 11,698 | 7,536 | 60,158 |
| Claiborne | 17,195 | 15,885 | 386,926 | 1,733 | 3,216 | 249,958 |
| Concordia | 20,822 | 17,605 | 95,252 | 5,681 | 9,122 | 65,417 |
| De Soto | 26,656 | 28,453 | 213,914 | 2,764 | 2,145 | 500,526 |
| East Baton Rouge | 440,171 | 533,159 | 209,483 | 88,333 | 271,021 | 336,772 |
| East Carroll | 7,759 | 4,564 | 57,743 | 3,236 | 4,292 | 52,945 |
| East Feliciana | 20,267 | 20,443 | 101,448 | 4,254 | 578 | 18,123 |
| Evangeline | 33,984 | 33,983 | 109,066 | 2,375 | 13,204 | 136,946 |
| Franklin | 20,767 | 17,190 | 91,898 | 19,330 | 14,215 | 22,545 |
| Grant | 22,309 | 30,442 | 228,268 | 3,056 | 30,586 | 20,935 |
| Iberia | 73,240 | 81,314 | 148,203 | 1,587 | 36,186 | 191,943 |
| Iberville | 33,387 | 33,800 | 166,045 | 4,443 | 4,091 | 34,425 |
| Jackson | 16,274 | 14,985 | 325,256 | 1,456 | 6,406 | 42,750 |
| Jefferson | 432,552 | 409,899 | 163,819 | 139,455 | 23,089 | 388,374 |
| Jefferson Davis | 31,594 | 30,920 | 143,786 | 2,012 | 25,477 | 368,542 |
| Lafayette | 221,578 | 365,403 | 465,829 | 3,886 | 190,797 | 1,124,549 |
| Lafourche | 96,318 | 114,084 | 187,358 | 8,094 | 7,753 | 233,514 |
| La Salle | 14,890 | 12,950 | 99,822 | 2,841 | 10,704 | 204,654 |
| Lincoln | 46,735 | 55,853 | 605,117 | 10,705 | 17,823 | 104,961 |
| Livingston | 128,026 | 319,465 | 1,034,629 | 45,155 | 1,989,420 | 341,825 |
| Madison | 12,093 | 8,527 | 69,481 | 16,470 | 518 | 580,379 |
| Morehouse | 27,979 | 20,131 | 93,591 | 51,589 | 1,137 | 48,572 |
| Natchitoches | 39,566 | 38,533 | 111,580 | 8,481 | 17,551 | 219,947 |
| Orleans | 343,829 | 309,933 | 49,024 | 4,956 | 11,197 | 117,698 |
| Ouachita | 153,720 | 170,696 | 469,659 | 188,928 | 21,251 | 164,729 |
| Plaquemines | 23,042 | 21,297 | 85,550 | 5,023 | 1,129 | 24,779 |
| Pointe Coupee | 22,802 | 20,654 | 136,229 | 9,244 | 1,932 | 65,077 |
| Rapides | 131,613 | 126,897 | 164,747 | 3,554 | 17,648 | 179,519 |
| Red River | 9,091 | 7,263 | 138,083 | 1,304 | 1,560 | 14,747 |
| Richland | 20,725 | 18,739 | 103,575 | 14,532 | 4,951 | 31,553 |
| Sabine | 24,233 | 22,891 | 145,083 | 5,993 | 13,512 | 62,336 |
| St. Bernard | 35,897 | 60,177 | 527,210 | 13,797 | 1,968 | 27,561 |
| St. Charles | 52,780 | 75,921 | 1,161,774 | 31,863 | 25,083 | 45,525 |
| St. Helena | 11,203 | 11,813 | 538,170 | 11,090 | 1,687 | 30,000 |
| St. James | 22,102 | 21,532 | 494,760 | 10,149 | 42,095 | 15,177 |
| St. John the Baptist | 45,924 | 62,739 | 1,191,056 | 26,674 | 3,236 | 1,149,319 |
| St. Landry | 83,384 | 81,778 | 463,898 | 1,712 | 11,983 | 259,169 |
| St. Martin | 52,160 | 70,185 | 978,826 | 3,644 | 185,717 | 208,809 |
| St. Mary | 54,650 | 41,749 | 311,117 | 3,934 | 15,515 | 24,680 |
| St. Tammany | 233,740 | 568,856 | 4,022,947 | 816,831 | 128,279 | 863,045 |
| Tangipahoa | 121,097 | 205,980 | 323,908 | 22,810 | 99,129 | 336,035 |
| Tensas | 5,252 | 2,742 | 35,779 | 8,417 | 3,115 | 70,783 |
| Terrebonne | 111,860 | 131,944 | 196,759 | 7,753 | 32,429 | 426,535 |
| Union | 22,721 | 23,953 | 471,529 | 3,070 | 5,960 | 99,579 |
| Vermilion | 57,999 | 72,020 | 174,269 | 8,287 | 22,539 | 354,932 |
| Vernon | 52,334 | 48,172 | 185,051 | 6,526 | 16,979 | 52,131 |
| Washington | 47,168 | 49,687 | 110,921 | 5,087 | 9,338 | 51,097 |
| Webster | 41,207 | 36,455 | 370,104 | 4,092 | 13,164 | 65,536 |
| West Baton Rouge | 23,788 | 33,410 | 980,905 | 18,434 | 2,281 | 171,050 |
| West Carroll | 11,604 | 9,818 | 111,523 | 10,275 | 693 | 75,649 |
| West Feliciana | 15,625 | 20,079 | 162,616 | 1,602 | 2,635 | 33,497 |
| Winn | 15,313 | 12,533 | 79,738 | 2,618 | 8,535 | 173,174 |
| Total Loss | 4,533,372 | 5,741,047 | 23,222,951 | 2,488,456 | 4,311,374 | 24,344,292 |

Appendix B

Historical (1960─2016) and 2050 Predicted Per Capita Property Loss (2016$), by Louisiana Parish.

| Parish | Extreme Cold | | Hail | | Lightning | | Tornado | |
| --- | --- | --- | --- | --- | --- | --- | --- | --- |
| Hist. | 2050 | Hist. | 2050 | Hist. | 2050 | Hist. | 2050 |
| Acadia | 2.07 | 1.94 | 0.05 | 0.04 | 0.15 | 0.16 | 14.86 | 16.35 |
| Allen | 7.22 | 6.79 | 0.07 | 0.06 | 0.52 | 0.57 | 1.11 | 1.22 |
| Ascension | 3.38 | 3.17 | 0.15 | 0.14 | 0.39 | 0.43 | 1.61 | 1.77 |
| Assumption | 5.60 | 5.26 | 0.26 | 0.23 | 0.88 | 0.97 | 2.63 | 2.89 |
| Avoyelles | 4.01 | 3.77 | 0.49 | 0.44 | 0.88 | 0.97 | 1.14 | 1.25 |
| Beauregard | 6.55 | 6.16 | 0.14 | 0.13 | 0.52 | 0.58 | 4.35 | 4.79 |
| Bienville | 27.99 | 26.32 | 0.11 | 0.10 | 1.22 | 1.35 | 14.49 | 15.94 |
| Bossier | 5.29 | 4.97 | 2.89 | 2.61 | 2.73 | 3.00 | 47.77 | 52.55 |
| Caddo | 1.85 | 1.74 | 1.04 | 0.93 | 0.15 | 0.17 | 4.36 | 4.80 |
| Calcasieu | 0.97 | 0.91 | 0.02 | 0.02 | 0.16 | 0.18 | 1.70 | 1.87 |
| Caldwell | 11.89 | 11.18 | 0.21 | 0.19 | 1.08 | 1.19 | 8.71 | 9.58 |
| Cameron | 14.45 | 13.59 | 0.15 | 0.14 | 1.28 | 1.41 | 9.65 | 10.61 |
| Catahoula | 10.42 | 9.80 | 1.62 | 1.46 | 0.85 | 0.94 | 6.81 | 7.49 |
| Claiborne | 25.90 | 24.36 | 0.12 | 0.11 | 0.18 | 0.20 | 14.30 | 15.74 |
| Concordia | 5.75 | 5.41 | 0.36 | 0.32 | 0.47 | 0.52 | 3.38 | 3.72 |
| De Soto | 7.99 | 7.52 | 0.11 | 0.10 | 0.07 | 0.08 | 15.99 | 17.59 |
| East Baton Rouge | 0.42 | 0.39 | 0.18 | 0.17 | 0.46 | 0.51 | 0.57 | 0.63 |
| East Carroll | 13.45 | 12.65 | 0.79 | 0.71 | 0.85 | 0.94 | 10.54 | 11.60 |
| East Feliciana | 5.28 | 4.96 | 0.23 | 0.21 | 0.03 | 0.03 | 0.81 | 0.89 |
| Evangeline | 3.41 | 3.21 | 0.08 | 0.07 | 0.35 | 0.39 | 3.66 | 4.03 |
| Franklin | 5.69 | 5.35 | 1.25 | 1.12 | 0.75 | 0.83 | 1.19 | 1.31 |
| Grant | 7.97 | 7.50 | 0.11 | 0.10 | 0.91 | 1.00 | 0.63 | 0.69 |
| Iberia | 1.94 | 1.82 | 0.02 | 0.02 | 0.40 | 0.45 | 2.15 | 2.36 |
| Iberville | 5.22 | 4.91 | 0.15 | 0.13 | 0.11 | 0.12 | 0.93 | 1.02 |
| Jackson | 23.08 | 21.71 | 0.11 | 0.10 | 0.39 | 0.43 | 2.59 | 2.85 |
| Jefferson | 0.43 | 0.40 | 0.38 | 0.34 | 0.05 | 0.06 | 0.86 | 0.95 |
| Jefferson Davis | 4.94 | 4.65 | 0.07 | 0.07 | 0.75 | 0.82 | 10.84 | 11.92 |
| Lafayette | 1.36 | 1.27 | 0.01 | 0.01 | 0.47 | 0.52 | 2.80 | 3.08 |
| Lafourche | 1.75 | 1.64 | 0.08 | 0.07 | 0.06 | 0.07 | 1.86 | 2.05 |
| La Salle | 8.20 | 7.71 | 0.24 | 0.22 | 0.75 | 0.83 | 14.37 | 15.80 |
| Lincoln | 11.52 | 10.83 | 0.21 | 0.19 | 0.29 | 0.32 | 1.71 | 1.88 |
| Livingston | 3.44 | 3.24 | 0.16 | 0.14 | 5.66 | 6.23 | 0.97 | 1.07 |
| Madison | 8.67 | 8.15 | 2.15 | 1.93 | 0.06 | 0.06 | 61.88 | 68.06 |
| Morehouse | 4.94 | 4.65 | 2.85 | 2.56 | 0.05 | 0.06 | 2.19 | 2.41 |
| Natchitoches | 3.08 | 2.90 | 0.24 | 0.22 | 0.41 | 0.46 | 5.19 | 5.71 |
| Orleans | 0.17 | 0.16 | 0.02 | 0.02 | 0.03 | 0.04 | 0.35 | 0.38 |
| Ouachita | 2.93 | 2.75 | 1.23 | 1.11 | 0.11 | 0.12 | 0.88 | 0.97 |
| Plaquemines | 4.27 | 4.02 | 0.26 | 0.24 | 0.05 | 0.05 | 1.06 | 1.16 |
| Pointe Coupee | 7.01 | 6.60 | 0.50 | 0.45 | 0.09 | 0.09 | 2.86 | 3.15 |
| Rapides | 1.38 | 1.30 | 0.03 | 0.03 | 0.13 | 0.14 | 1.29 | 1.41 |
| Red River | 20.22 | 19.01 | 0.20 | 0.18 | 0.20 | 0.21 | 1.85 | 2.03 |
| Richland | 5.88 | 5.53 | 0.86 | 0.78 | 0.24 | 0.26 | 1.53 | 1.68 |
| Sabine | 6.74 | 6.34 | 0.29 | 0.26 | 0.54 | 0.59 | 2.48 | 2.72 |
| St. Bernard | 9.32 | 8.76 | 0.25 | 0.23 | 0.03 | 0.03 | 0.42 | 0.46 |
| St. Charles | 16.27 | 15.30 | 0.47 | 0.42 | 0.30 | 0.33 | 0.55 | 0.60 |
| St. Helena | 48.45 | 45.56 | 1.04 | 0.94 | 0.13 | 0.14 | 2.31 | 2.54 |
| St. James | 24.43 | 22.98 | 0.52 | 0.47 | 1.78 | 1.96 | 0.64 | 0.70 |
| St. John the Baptist | 20.19 | 18.98 | 0.47 | 0.43 | 0.05 | 0.05 | 16.65 | 18.32 |
| St. Landry | 6.03 | 5.67 | 0.02 | 0.02 | 0.13 | 0.15 | 2.88 | 3.17 |
| St. Martin | 14.83 | 13.95 | 0.06 | 0.05 | 2.41 | 2.65 | 2.70 | 2.98 |
| St. Mary | 7.92 | 7.45 | 0.10 | 0.09 | 0.34 | 0.37 | 0.54 | 0.59 |
| St. Tammany | 7.52 | 7.07 | 1.60 | 1.44 | 0.21 | 0.23 | 1.38 | 1.52 |
| Tangipahoa | 1.67 | 1.57 | 0.12 | 0.11 | 0.44 | 0.48 | 1.48 | 1.63 |
| Tensas | 13.87 | 13.05 | 3.41 | 3.07 | 1.03 | 1.14 | 23.47 | 25.81 |
| Terrebonne | 1.59 | 1.49 | 0.07 | 0.06 | 0.22 | 0.25 | 2.94 | 3.23 |
| Union | 20.94 | 19.69 | 0.14 | 0.13 | 0.23 | 0.25 | 3.78 | 4.16 |
| Vermilion | 2.57 | 2.42 | 0.13 | 0.12 | 0.28 | 0.31 | 4.48 | 4.93 |
| Vernon | 4.09 | 3.84 | 0.15 | 0.14 | 0.32 | 0.35 | 0.98 | 1.08 |
| Washington | 2.37 | 2.23 | 0.11 | 0.10 | 0.17 | 0.19 | 0.93 | 1.03 |
| Webster | 10.80 | 10.15 | 0.12 | 0.11 | 0.33 | 0.36 | 1.63 | 1.80 |
| West Baton Rouge | 31.22 | 29.36 | 0.61 | 0.55 | 0.06 | 0.07 | 4.65 | 5.12 |
| West Carroll | 12.08 | 11.36 | 1.16 | 1.05 | 0.06 | 0.07 | 7.00 | 7.71 |
| West Feliciana | 8.61 | 8.10 | 0.09 | 0.08 | 0.12 | 0.13 | 1.52 | 1.67 |
| Winn | 6.77 | 6.36 | 0.23 | 0.21 | 0.62 | 0.68 | 12.56 | 13.82 |
| Louisiana | - | 4.05 | - | 0.43 | - | 0.75 | - | 4.24 |
